# Supplementary material for: Observations on carapace color change in the juvenile big-headed turtle (Platysternon megacephalum)
Source: PeerJ. 2019 Jul 26;7:e7331. doi: 10.7717/peerj.7331 (PMC6662560; doi:10.7717/peerj.7331)
Supplement: Supplemental Information 2 — Each data indicates the the ratio of the pixels of the melanin deposition area to the pixels of the total HE staining image. [file peerj-07-7331-s002.xlsx]

## Sheet: Sheet1
	Yellowish brown			Olive green			Chestnut brown			Dark brown
Dorsal side	0.120248	0.103843	0.106032	0.104438	0.103843	0.121531	0.110948	0.106239	0.102569	0.098781	0.096583	0.099578
Ventral side	0.002967	0.002269	0.003041	0.003326	0.002793	0.003233	0.00296	0.003543	0.00341	0.002719	0.002951	0.003177
